# Supplementary material
Source: PubMed Central journal article supplement (PMC4869517)

**A**

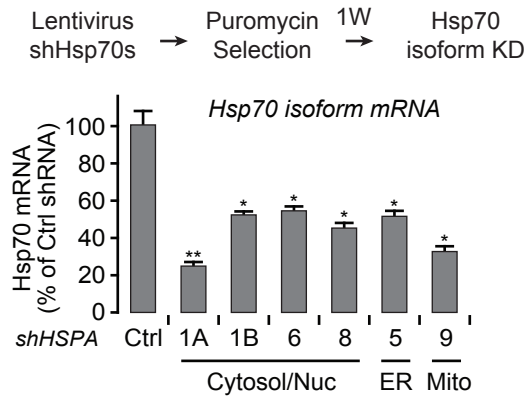

**B**

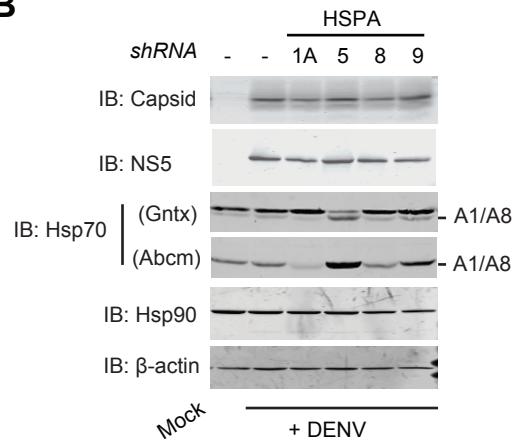

**C**

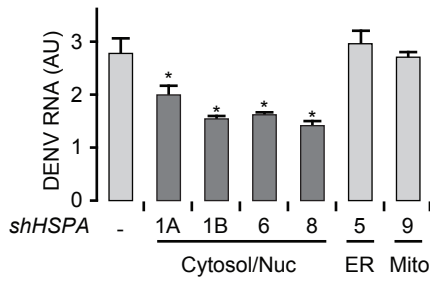

**D**

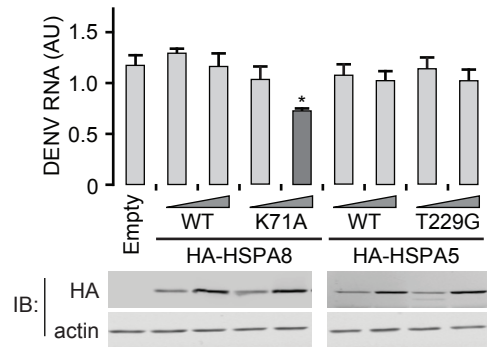

**E**

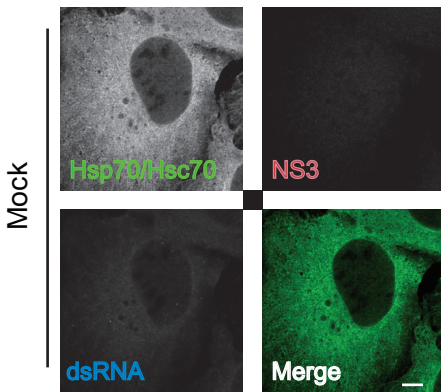

**F**

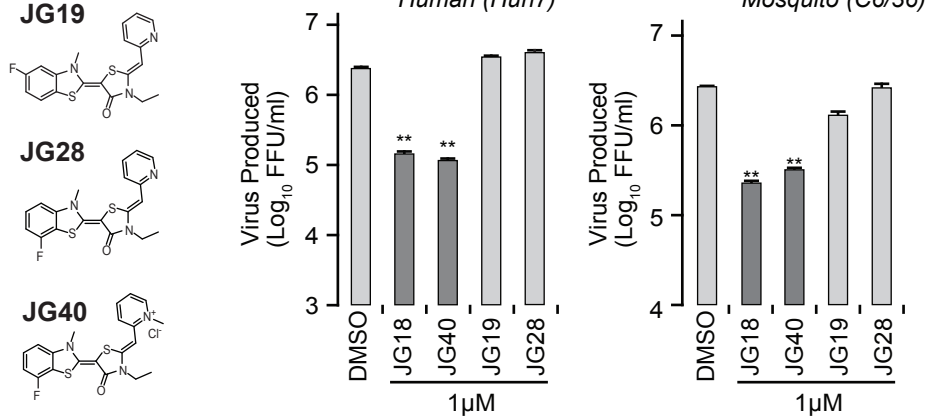

**G**

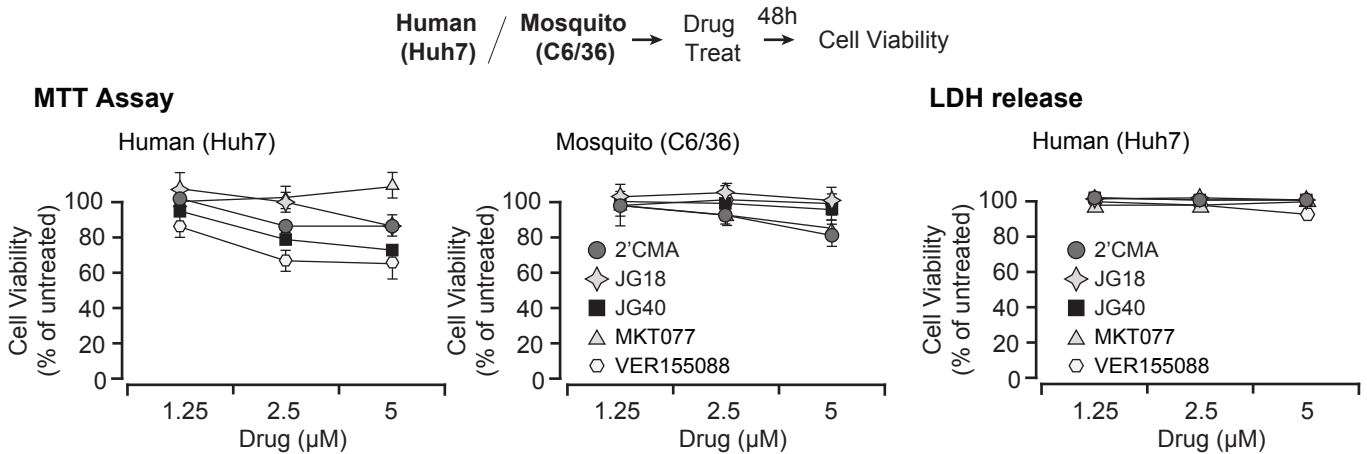

Supplement: NIHMS737653-supplement-1.pdf [file NIHMS737653-supplement-1.pdf]

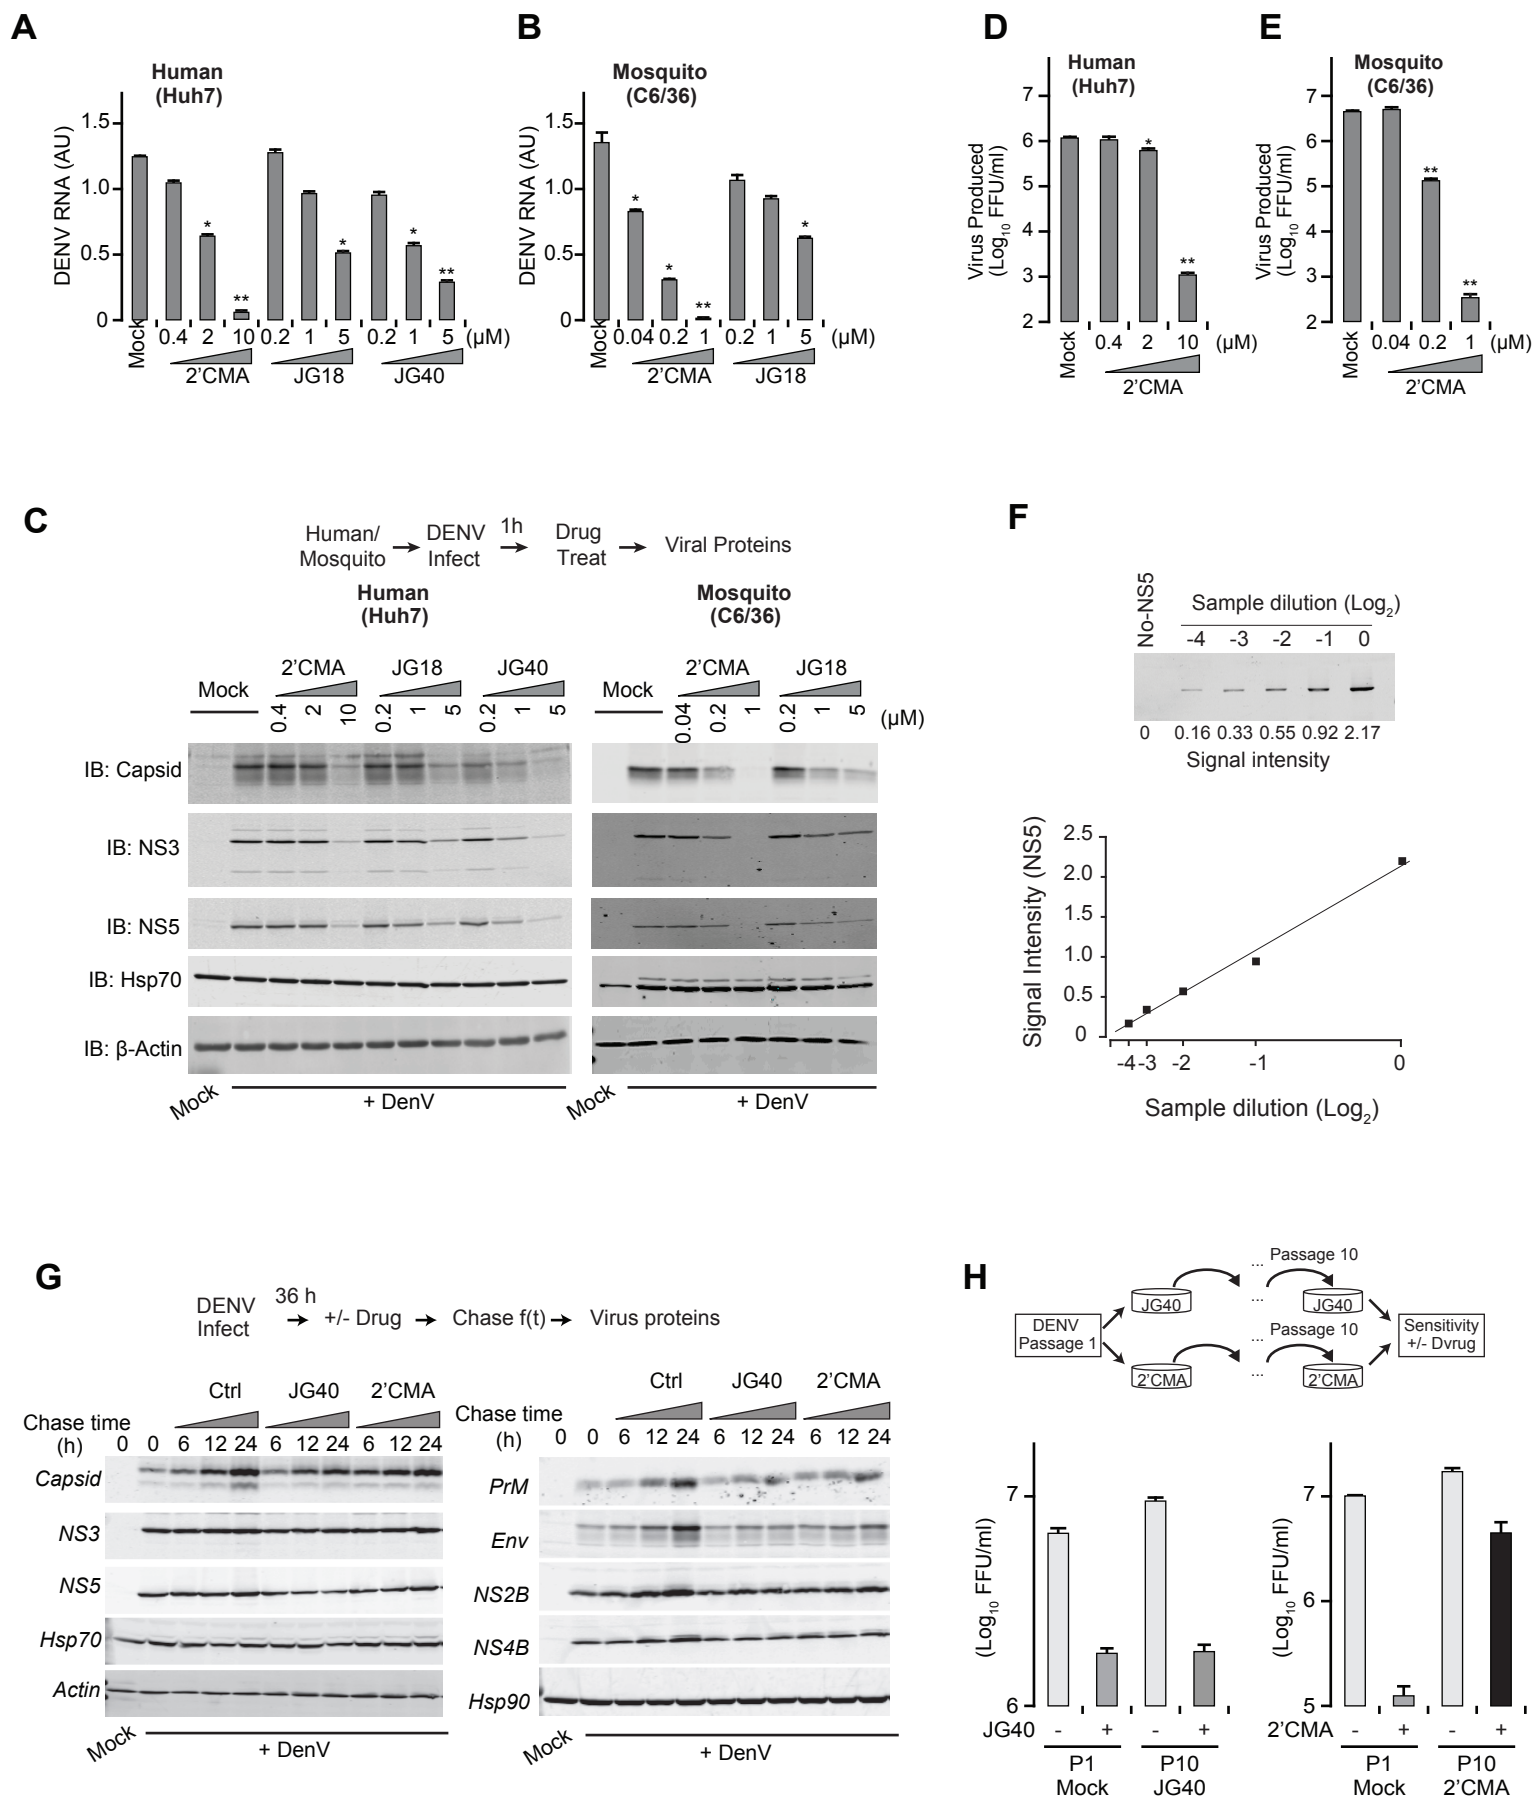

Supplement: NIHMS737653-supplement-2.pdf [file NIHMS737653-supplement-2.pdf]

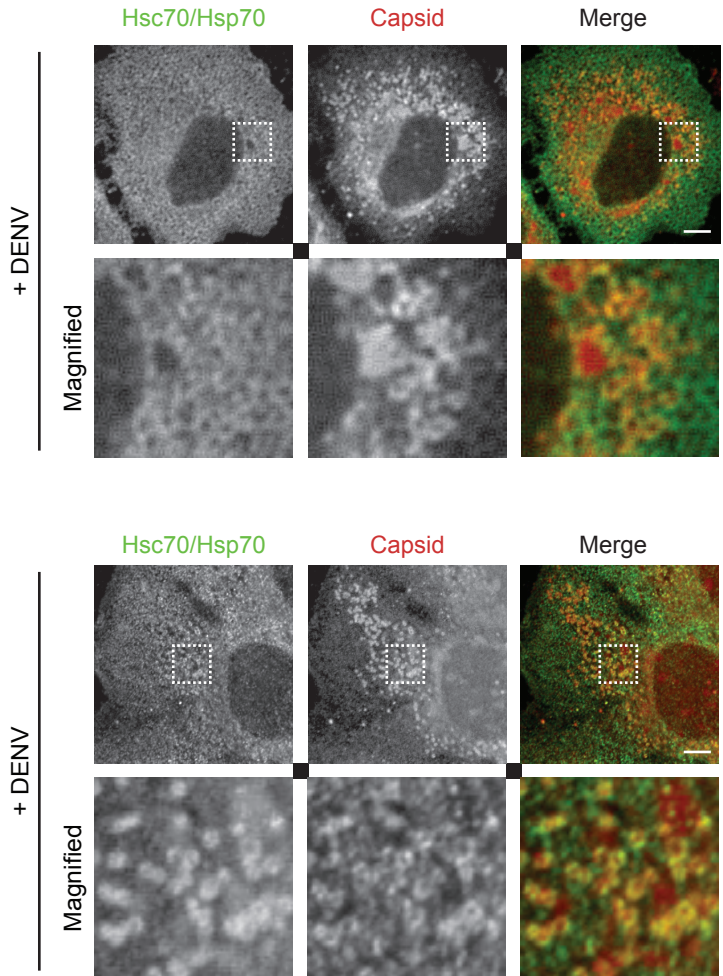

Supplement: NIHMS737653-supplement-3.pdf [file NIHMS737653-supplement-3.pdf]

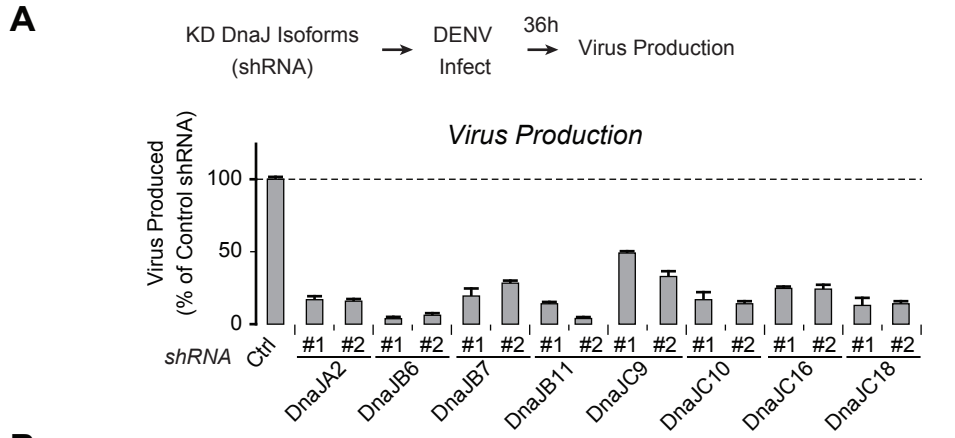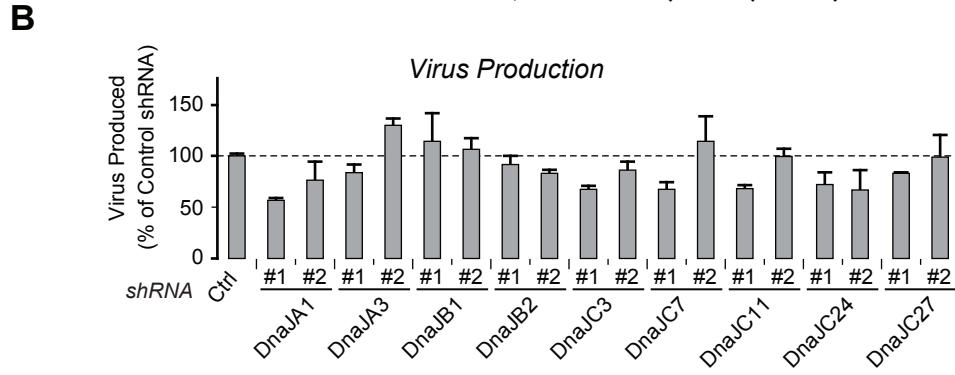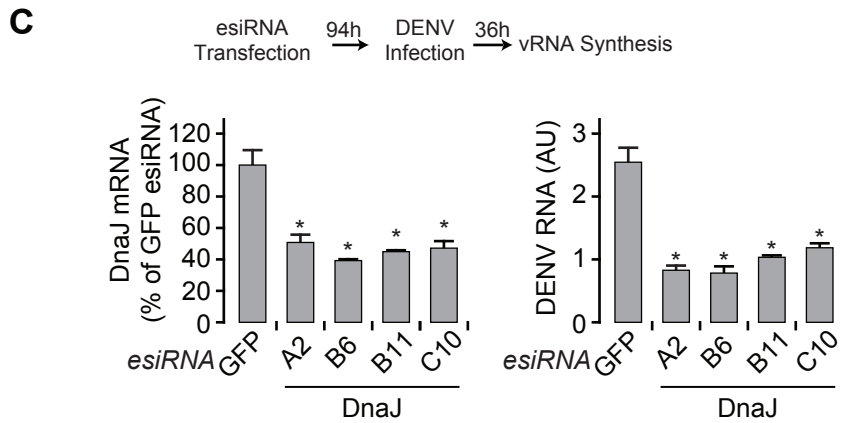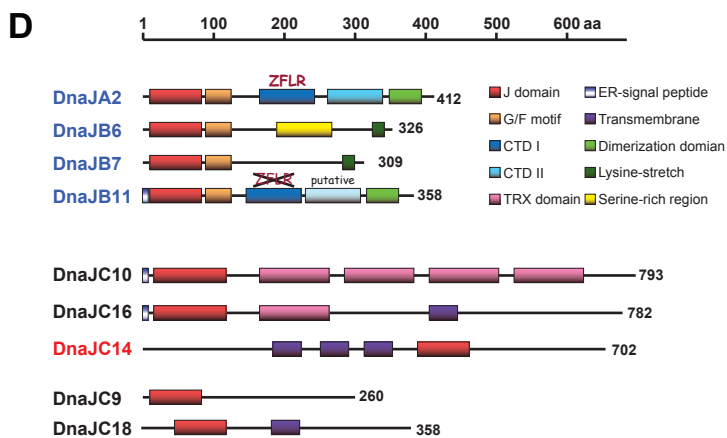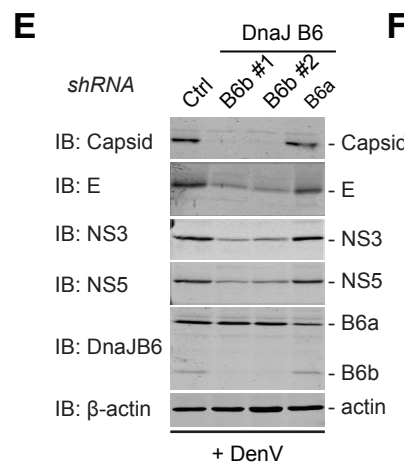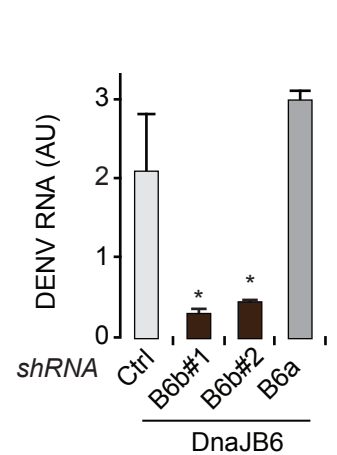

Supplement: NIHMS737653-supplement-4.pdf [file NIHMS737653-supplement-4.pdf]

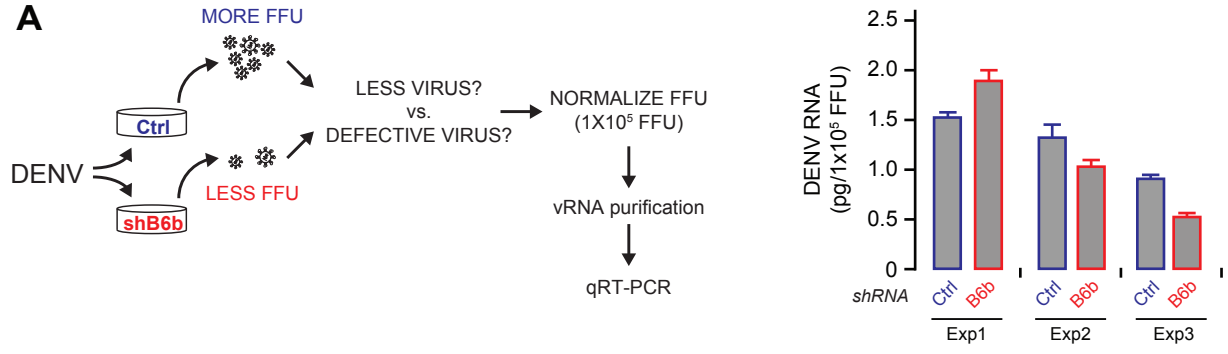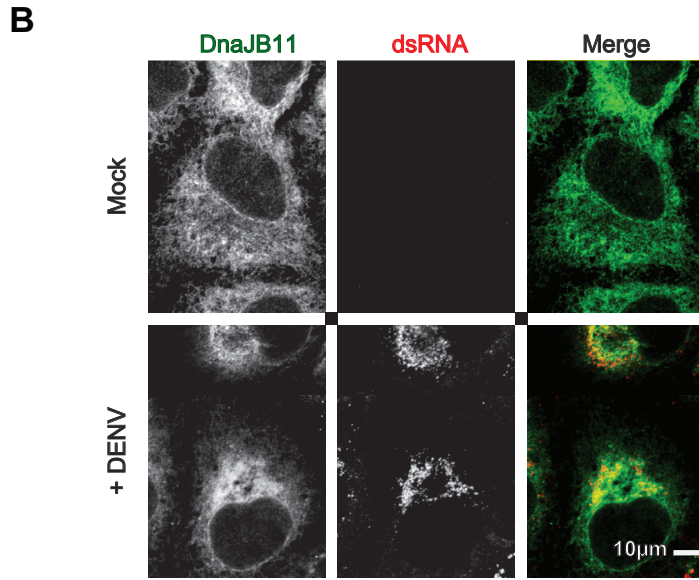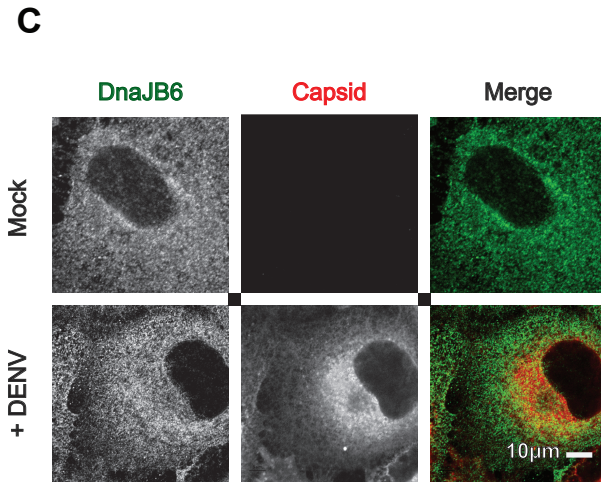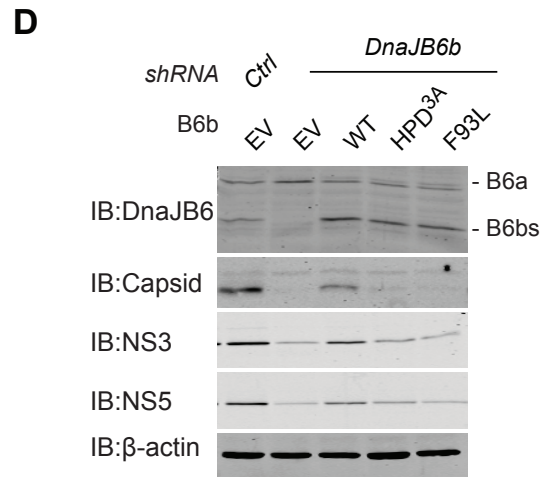

Supplement: NIHMS737653-supplement-5.pdf [file NIHMS737653-supplement-5.pdf]

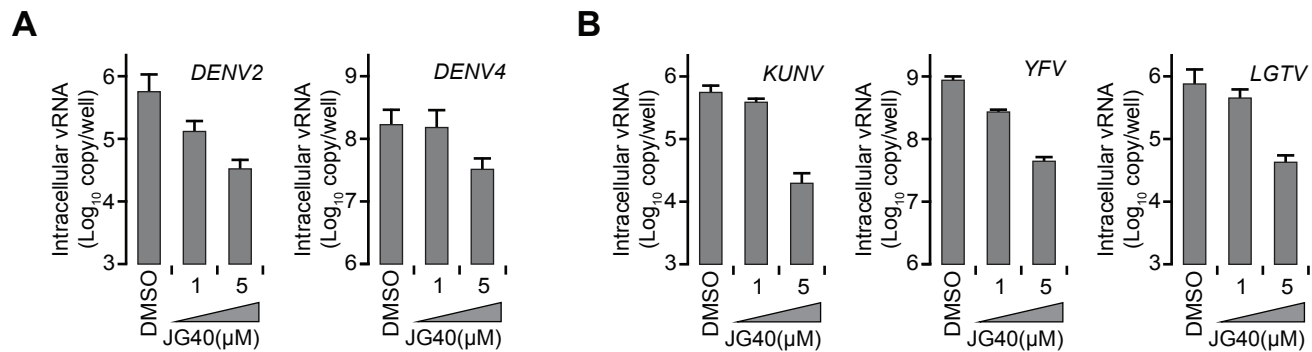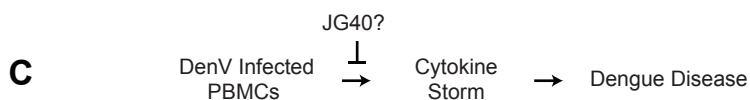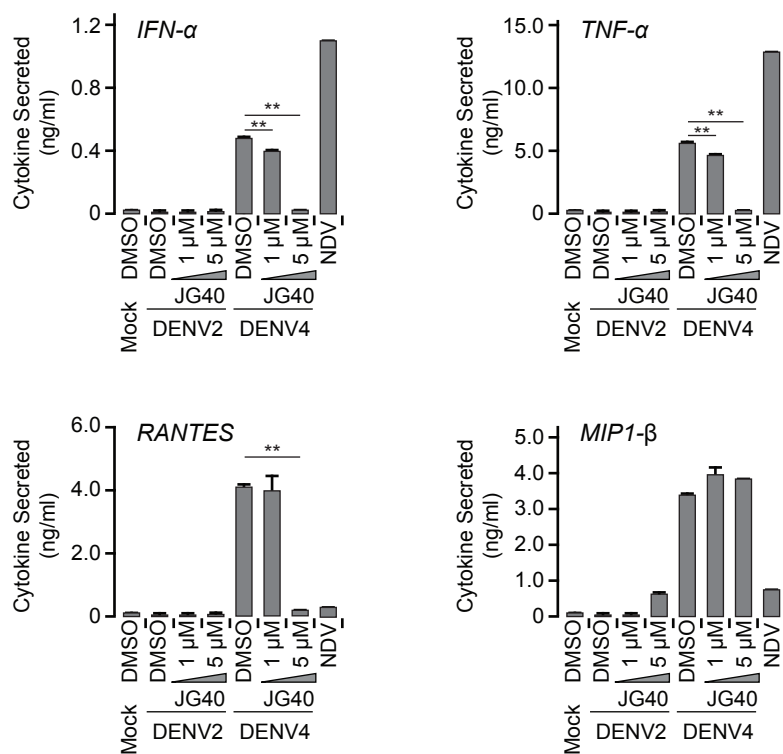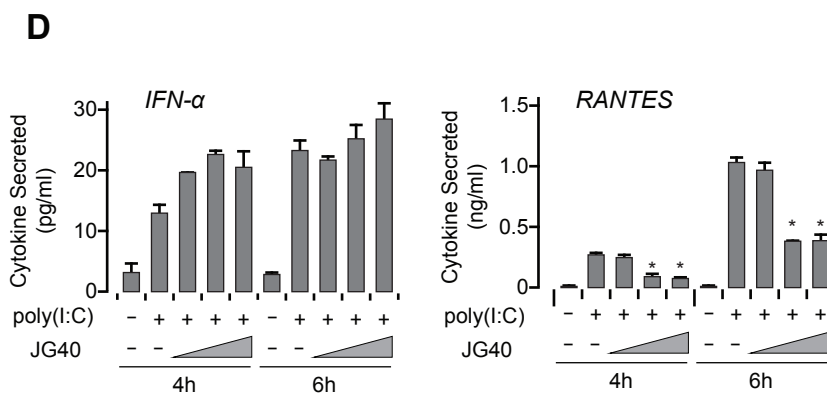

Supplement: NIHMS737653-supplement-6.pdf [file NIHMS737653-supplement-6.pdf]
